# Supplementary material for: Identification of the Imprinted KLF14 Transcription Factor Undergoing Human-Specific Accelerated Evolution
Source: PLOS journal article supplement (doi:10.1371/journal.pgen.0030065), 2007-05-03
Supplement: S3 (10.1371/journal.pgen.0030065.s003) [file journal.pgen.0030065.s003]

**Supplementary Table 3:** Diversity Statistics for Human and Chimpanzee

|  | **# of chromosomes** | **Total Gene (966 sites)** | | | **Nonsynonymous (703 sites)** | | | **Synonymous (263 sites)** | | |
| --- | --- | --- | --- | --- | --- | --- | --- | --- | --- | --- |
| **SNPs** | **Pi (%)** | **Theta (%)** | **SNPs** | **Pi (%)** | **Theta (%)** | **SNPs** | **Pi (%)** | **Theta (%)** |
| **Human** | 264 | 10 | 0.168 | 0.168 | 6 | 0.108 | 0.139 | 4 | 0.326 | 0.247 |
| **Chimpanzee** | 40 | 3 | 0.016 | 0.073 | 0 | 0 | 0 | 3 | 0.057 | 0.268 |
