# Supplementary material for: Identification of the Imprinted KLF14 Transcription Factor Undergoing Human-Specific Accelerated Evolution
Source: PLOS journal article supplement (doi:10.1371/journal.pgen.0030065), 2007-05-03
Supplement: S5 (10.1371/journal.pgen.0030065.s005) [file journal.pgen.0030065.s005]

**Supplementary Table 5: Gorilla genotypes**

| **ID** | **Species** | **IPBIR No.** | **ISIS No.** | **ss60197531** | **ss60197532** |
| --- | --- | --- | --- | --- | --- |
| Ggo7 | *Gorilla gorilla* | PR00107 | 1890 | C/C | C/C |
| Ggo8 | *Gorilla gorilla* | PR00573 | 27944 | G/G | C/C |
| GL3-05 | *Gorilla gorilla* | - | - | G/G | C/A |
